# Supplementary material for: Monarda didyma Hydrolate Affects the Survival and the Behaviour of Drosophila suzukii
Source: MDPI journal article supplement (doi:10.3390/insects13030280), 2022-03-11
Supplement: s1 [file s1]

**Table S1.** Primer used in this study.

| Gene name       | Primer sequence (5'-3')                               | Melting temperature (°C) | Amplicon dimension (bp) |
|-----------------|-------------------------------------------------------|--------------------------|-------------------------|
| <i>Cyp4e3</i>   | F: CAAAGCATCTGGAGCACATTT<br>R: GCCATTTGCTGCCATAACTC   | 62                       | 117                     |
| <i>Cyp4g15</i>  | F: CATCGAGCTCTTCAACGAGAA<br>R: CCATCGCAGTCTCCAATAGAAT | 62                       | 128                     |
| <i>Cyp6a17</i>  | F: AAGACCAACGAGAAGCGAAAC<br>R: CTCGAAACCAGCCACAAAGA   | 60                       | 220                     |
| <i>Cyp6d5-2</i> | F: GCTGACCTACGATGCCATATC<br>R: AGGTGTGCCCTTCTTGATTAC  | 60                       | 154                     |
| <i>GstZ2</i>    | F: GCGATGAACCTGAAGGAGATAC<br>R: AGGGTGTGTCCATCGATCT   | 62                       | 140                     |
| <i>GstD10</i>   | F: GCGTGCTATCATGGTGTATCT<br>R: TCTTGTAAGGGTGCCCATATC  | 62                       | 143                     |
| <i>Est1</i>     | F: TTGGGCGCCAAGGTTATT<br>R: GATTTCGCTGTCGTAGATGGT     | 62                       | 129                     |
| <i>Actin</i>    | F: CTACCACAACGATGCCAAGA<br>R: AAGGTCAGGAAGCCGAGA      | 61                       | 180                     |
| <i>TBP</i>      | F: CCACGGTGAATCTGTGCT<br>R: GGAGTCGTCCTCGCTCTT        | 61                       | 182                     |

**Table S2.** Comparison of probing, non-probing and dabbling phases (mean  $\pm$  SEM) measured by EPG on *D. suzukii* females left for 24 h on both untreated and HY treated diets. n.s. = not significant at  $p < .05$ . \*  $p < 0.05$  according to non-parametric ANOVA Mann–Whitney U test.

| <b>PROBING</b>           | Mean probing duration per insect (mins.) | Mean number of probing events | Mean duration of probing event (mins.) |
|--------------------------|------------------------------------------|-------------------------------|----------------------------------------|
| 100% <i>M. didyma</i> HY | 13.06 $\pm$ 1.88                         | 156.70 $\pm$ 21.54            | 0.12 $\pm$ 0.04                        |
| Control                  | 12.48 $\pm$ 2.22                         | 157.91 $\pm$ 25.02            | 0.10 $\pm$ 0.02                        |
| Statistical analysis     | n.s.                                     | n.s.                          | n.s.                                   |

| <b>NON-PROBING</b>       | Mean non probing duration per insect (mins.) | Mean number of non-probing events | Mean duration of non-probing event (mins.) |
|--------------------------|----------------------------------------------|-----------------------------------|--------------------------------------------|
| 100% <i>M. didyma</i> HY | 106.73 $\pm$ 1.89                            | 212.30 $\pm$ 26.32                | 0.69 $\pm$ 0.08                            |
| Control                  | 107.29 $\pm$ 2.21                            | 197.39 $\pm$ 30.37                | 0.90 $\pm$ 0.17                            |
| Statistical analysis     | n.s.                                         | n.s.                              | n.s.                                       |

| <b>DABBING</b>           | Mean dabbling duration per insect (sec.) | Mean number of dabbling events | Mean duration of dabbling event (sec.) |
|--------------------------|------------------------------------------|--------------------------------|----------------------------------------|
| 100% <i>M. didyma</i> HY | 11.47 $\pm$ 2.46 sec                     | 54.39 $\pm$ 10.22 sec          | 0.20 $\pm$ 0.01 sec                    |
| Control                  | 10.17 $\pm$ 2.24 sec                     | 37.83 $\pm$ 8.42 sec           | 0.27 $\pm$ 0.02 sec                    |
| Statistical analysis     | n.s.                                     | n.s.                           | *                                      |

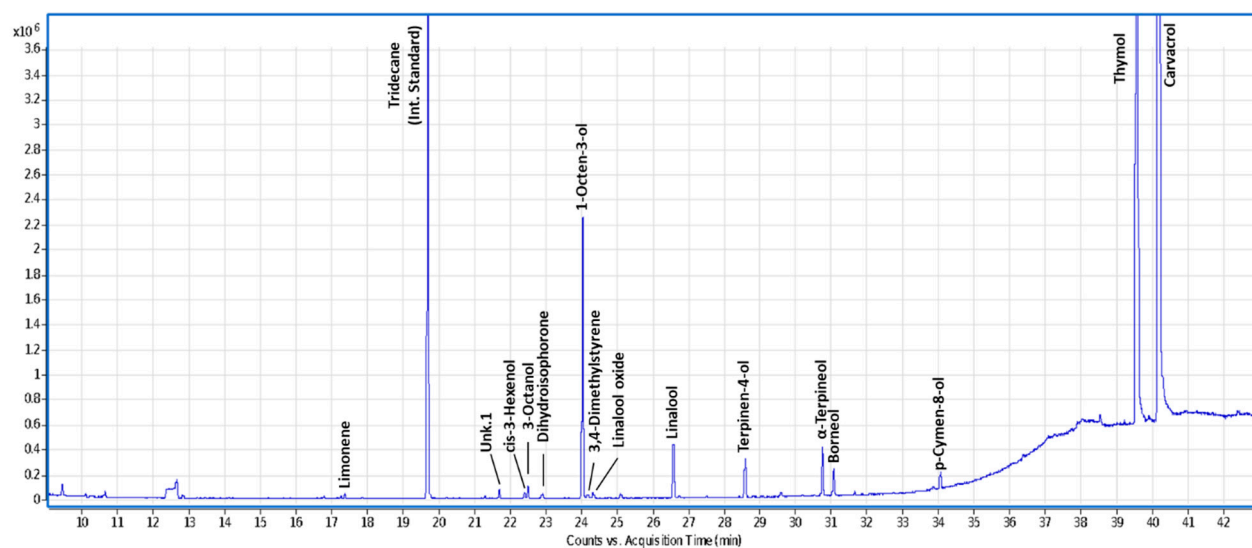

**Figure S1.** Magnification of Figure 2 of the total ion chromatogram (TIC) of main monoterpenes and other volatile organic compounds present in *M. didyma* HY.
